# Supplementary material for: Evaluation of strategies for evidence-driven genome annotation using long-read RNA-seq
Source: HighWire-hosted journal article supplement (doi:10.1101/gr.279864.124), 2024-12-23
Supplement: Supplemental_Code.zip [file Cufflinks_transcriptome_wtc11.xlsx]

## Sheet: Hoja1
N_genes	nt_sn	nt_sp	exon_sn	exon_sp	gene_sn	gene_sp
Transcriptome_short_reads	47.4	97.4	47.1	89.4	31.3	42.0
Transcriptome_long_reads	61.9	94.8	62.2	83.1	46.6	28.2
