# Supplementary material for: Evaluation of strategies for evidence-driven genome annotation using long-read RNA-seq
Source: HighWire-hosted journal article supplement (doi:10.1101/gr.279864.124), 2024-12-23
Supplement: Supplemental_Code.zip [file missed_loci.xlsx]

## Sheet: Hoja1
Subsampling	Missed_loci
10	61.6
15	57.2
20	53.7
25	51.1
50	43.3
75	39.2
100	36.8
