# Supplementary material for: Evaluation of strategies for evidence-driven genome annotation using long-read RNA-seq
Source: HighWire-hosted journal article supplement (doi:10.1101/gr.279864.124), 2024-12-23
Supplement: Supplemental_Code.zip [file missing_loci.xlsx]

## Sheet: Hoja1
Subsampling	Missed_loci
10	20.5
15	19.2
20	17.9
25	17.2
50	14.5
75	13.6
100	12.5
