# Supplementary material for: Evaluation of strategies for evidence-driven genome annotation using long-read RNA-seq
Source: HighWire-hosted journal article supplement (doi:10.1101/gr.279864.124), 2024-12-23
Supplement: Supplemental_Code.zip [file subsample_0_5.xlsx]

## Sheet: Hoja1
Type	Sn	Sp
Nt	78.1	92.1
Exon	69.8	85.8
Gene	40.5	40.7
