# Supplementary material for: Evaluation of strategies for evidence-driven genome annotation using long-read RNA-seq
Source: HighWire-hosted journal article supplement (doi:10.1101/gr.279864.124), 2024-12-23
Supplement: Supplemental_Code.zip [file subsample_0_15.xlsx]

## Sheet: Hoja1
Type	Sn	Sp
Nt	71.4	91.5
Exon	63.8	84.5
Gene	34.2	36.7
