# Supplementary material for: Evaluation of strategies for evidence-driven genome annotation using long-read RNA-seq
Source: HighWire-hosted journal article supplement (doi:10.1101/gr.279864.124), 2024-12-23
Supplement: Supplemental_Code.zip [file subsample_0_20.xlsx]

## Sheet: Hoja1
Type	Sn	Sp
Nt	73.3	91.8
Exon	65.5	85
Gene	36.3	38.3
