# Supplementary material for: Evaluation of strategies for evidence-driven genome annotation using long-read RNA-seq
Source: HighWire-hosted journal article supplement (doi:10.1101/gr.279864.124), 2024-12-23
Supplement: Supplemental_Code.zip [file subsampling_25.xlsx]

## Sheet: Hoja1
Type	Sn	Sp
Nt	45.4	97.4
Exon	48.7	90.3
Gene	36.4	44.6
