# Supplementary material for: Evaluation of strategies for evidence-driven genome annotation using long-read RNA-seq
Source: HighWire-hosted journal article supplement (doi:10.1101/gr.279864.124), 2024-12-23
Supplement: Supplemental_Code.zip [file subsampling_75.xlsx]

## Sheet: Hoja1
Type	Sn	Sp
Nt	58.5	95.3
Exon	60.3	85.6
Gene	48.8	33.7
